# Supplementary material for: Mitochondrial unfolded protein response gene CLPP changes mitochondrial dynamics and affects mitochondrial function
Source: PeerJ. 2019 Jul 2;7:e7209. doi: 10.7717/peerj.7209 (PMC6611452; doi:10.7717/peerj.7209)
Supplement: Dataset 8 [file peerj-07-7209-s008.xls]

## Sheet: Results
Block Type	96well
Chemistry	SYBR_GREEN
Experiment File Name	I:\wuguijun opa1 fis1 pink1 20180829.eds
Experiment Run End Time	2018-08-29 16:33:54 PM CST
Instrument Type	steponeplus
Passive Reference	ROX
	Sample Name	Target Name	Cт
	Low sugar group	pink1	24.0097
	Low sugar group	pink1	24.0814
	Low sugar group	pink1	24.0885
	High glucose group	pink1	23.0143
	High glucose group	pink1	22.9445
	High glucose group	pink1	23.0259
	High glucose siNC	pink1	23.9719
	High glucose siNC	pink1	23.9457
	High glucose siNC	pink1	24.1239
	High glucose siCLPP	pink1	23.6601
	High glucose siCLPP	pink1	23.6446
	High glucose siCLPP	pink1	23.539
	High fat group	pink1	22.9723
	High fat group	pink1	22.0211
	High fat group	pink1	21.9043
	High fat siNC	pink1	24.3464
	High fat siNC	pink1	24.3194
	High fat siNC	pink1	24.3754
	High fat siCLPP	pink1	23.3235
	High fat siCLPP	pink1	23.4484
	High fat siCLPP	pink1	23.4495
	Low sugar group	parkin	28.3947
	Low sugar group	parkin	28.4639
	Low sugar group	parkin	28.5768
	High glucose group	parkin	27.2707
	High glucose group	parkin	27.2535
	High glucose group	parkin	27.1265
	High glucose siNC	parkin	28.4527
	High glucose siNC	parkin	28.2678
	High glucose siNC	parkin	28.444
	High glucose siCLPP	parkin	27.8616
	High glucose siCLPP	parkin	27.7967
	High glucose siCLPP	parkin	27.8605
	High fat group	parkin	26.6229
	High fat group	parkin	26.7377
	High fat group	parkin	26.7124
	High fat siNC	parkin	28.6582
	High fat siNC	parkin	28.7289
	High fat siNC	parkin	28.7176
	High fat siCLPP	parkin	27.7953
	High fat siCLPP	parkin	27.4865
	High fat siCLPP	parkin	27.5962
Analysis Type	Singleplex
Endogenous Control	opa1
RQ Min/Max Confidence Level	95.0
Reference Sample	1
