# Supplementary material for: Mitochondrial unfolded protein response gene CLPP changes mitochondrial dynamics and affects mitochondrial function
Source: PeerJ. 2019 Jul 2;7:e7209. doi: 10.7717/peerj.7209 (PMC6611452; doi:10.7717/peerj.7209)
Supplement: Dataset 13 [file peerj-07-7209-s013.xlsx]

## Sheet: 1
武汉赛维尔生物有限公司生化报告
姓名：吴贵军		数量：
检测指标：ATP含量，胰岛素		样本类型：细胞上清
标本处理：
Ⅰ血标本：3000-4000r，10min，取上清，放4℃冰箱，待测。
Ⅱ细胞：收集上清，放4℃冰箱，待测。
Ⅲ组织：称适量组织，用9倍生理盐水研磨，然后将研磨液3000-4000r，离心10min，取上清，
放4℃冰箱，待测。
仪器信息
台式离心机	TGL-16C
纯水仪	AJC-0501-P
微型旋涡混合器	WH-2
水浴锅	TL-420D
10μl枪	DS74948
1000μl枪	DS93879
100μl枪	DX15487
冰箱	BCD-186
酶标仪	RT-2100C
试剂盒信息
试剂盒名称	货号	厂家
Mouse INS(Insulin) ELISA Kit	E-EL-M2614c	伊莱瑞特
ATP含量酶试剂盒	A095	南京建成

## Sheet: Protein concentration
							Standard OD Value	Standard concentration（mg/ml)
							0	0
							0.064	0.025
							0.14	0.05
							0.266	0.1
							0.499	0.2
							0.74	0.3
							0.908	0.4
							1.123	0.5
Sample number	OD value	Protein concentration（mg/ml)
Low sugar group	0.378	0.785849
High glucose group	0.415	0.868007
High glucose siNC	0.373	0.774747
High sugar Si CLPP	0.403	0.841362
High fat group	0.461	0.970151
High fat siNC	0.454	0.954607
High-fat Si CLPP	0.472	0.994576
							Note: Sample dilution 5 times

## Sheet: ATP Content Result 1
Sample number	Determination of OD value	Contrast OD value	Protein concentration（mg/ml)	ATP concentration（umol/gprot）
Low sugar group	0.416	0.382	0.916859	337.12
High glucose group	0.41	0.389	0.830259	229.939
High fat group	0.404	0.381	1.01678	205.64				ATP concentration (umol/gprot)= (determination of OD value-control OD value)/(standard OD value-blank OD value)* standard concentration (1000umol/l)* sample dilution multiple before testing/protein concentration (gprot/l) before testing
blank	0.19
standard	0.3

## Sheet: ATP Content Result 2
Specimen number	Od determination	Control group OD value	Protein concentration（mg/ml)	ATP concentration（umol/gprot）
Low sugar group	0.412	0.384	0.785849	320.993
High glucose group	0.417	0.396	0.868008	217.958
High glucose siNC	0.409	0.391	0.774747	209.31
High sugar Si CLPP	0.407	0.397	0.841361	107.077			ATP concentration（umol/gprot）=（Od determination-Control group OD value）/（Standard OD value-Blank OD value）*Standard concentration（1000umol/l)*Sample test前稀释倍数/待测样本蛋白浓度（gprot/l）
High fat group	0.409	0.385	0.970151	222.869
High fat siNC	0.408	0.382	0.954607	245.372
High-fat Si CLPP	0.411	0.397	0.994576	126.814
blank	0.191
standard	0.302
