# Supplementary material for: Mitochondrial unfolded protein response gene CLPP changes mitochondrial dynamics and affects mitochondrial function
Source: PeerJ journal article supplement (doi:10.7717/peerj.7209), 2019-07-02
Supplement: datasets9.tif [file datasets9.tif]

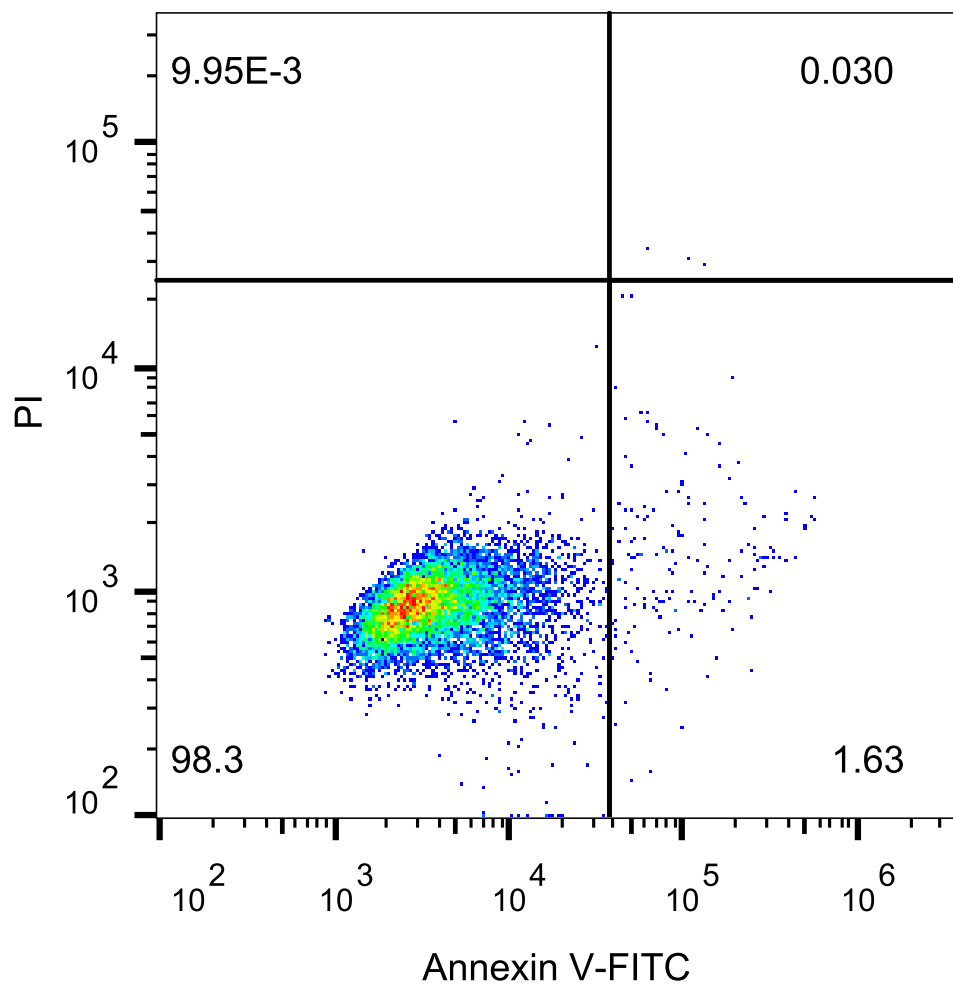

LD-1.fcs

FSC-A, FSC-Width subset

10047

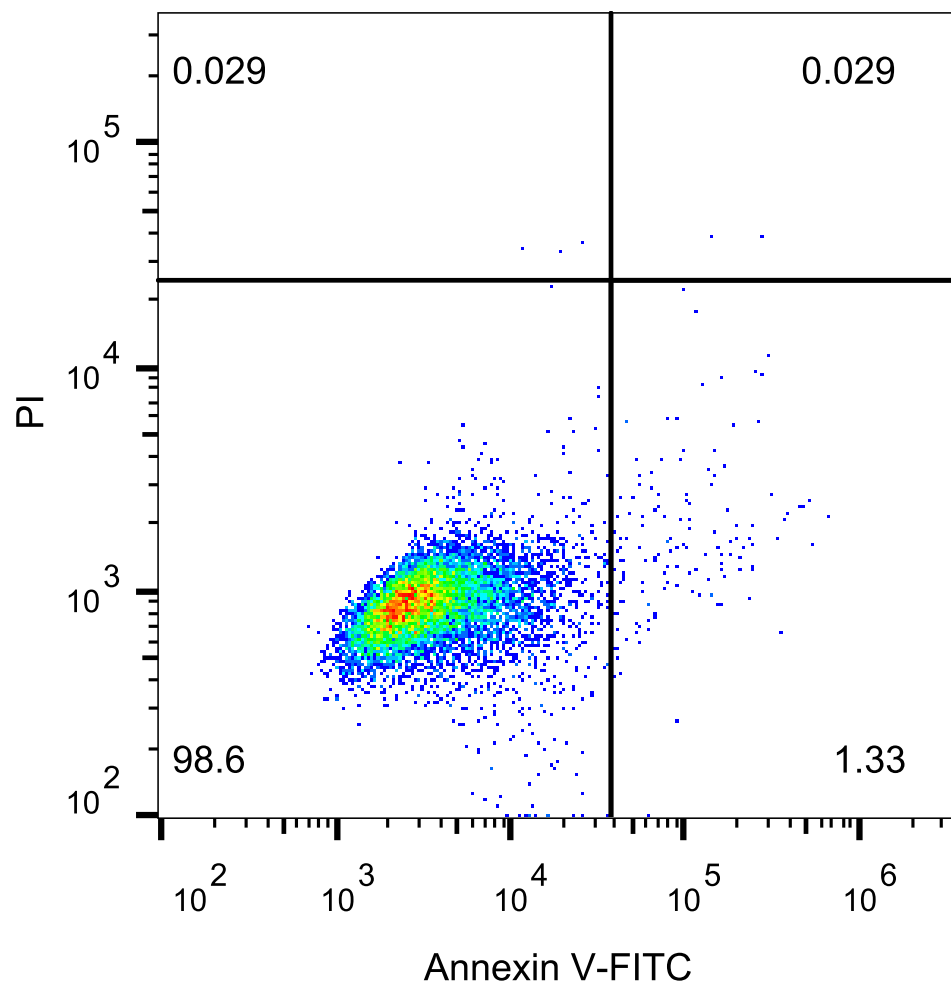

LD-2.fcs  
FSC-A, FSC-Width subset  
10455

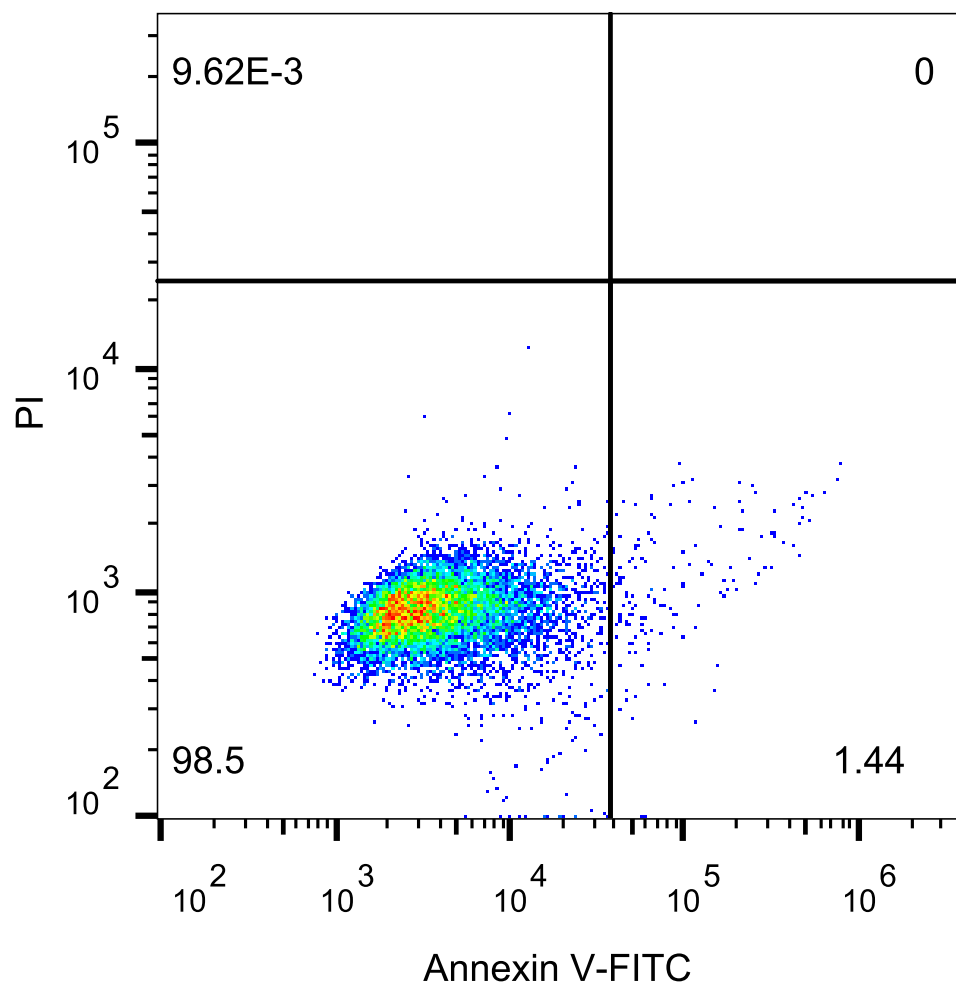

LD-3.fcs

FSC-A, FSC-Width subset

10400

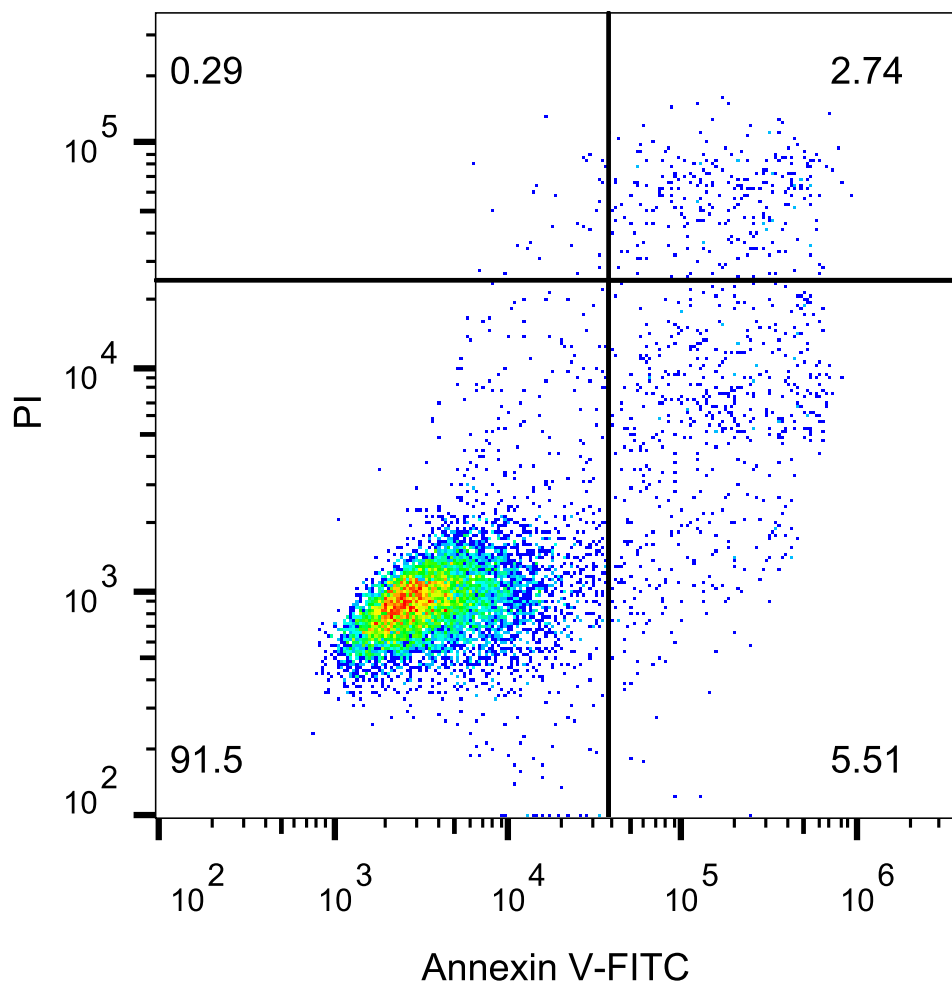

HD-1.fcs

FSC-A, FSC-Width subset

10265

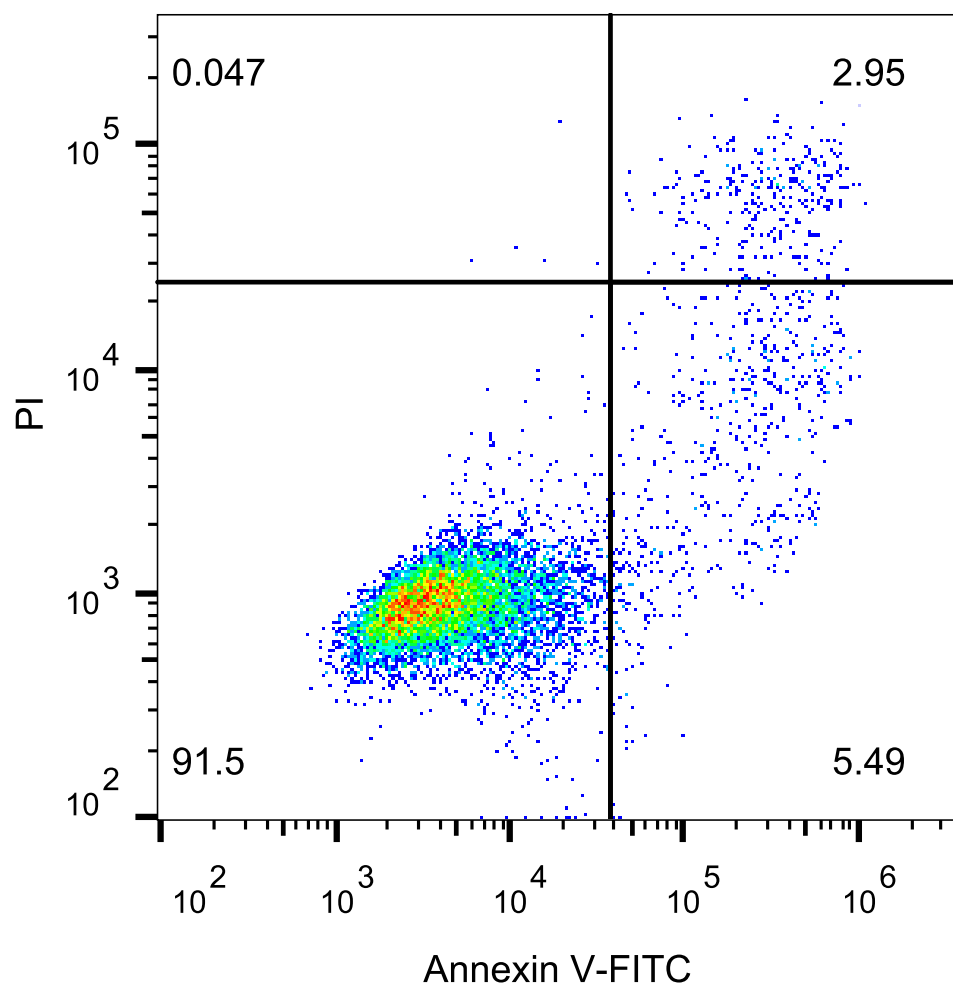

HD-2.fcs

FSC-A, FSC-Width subset

10742

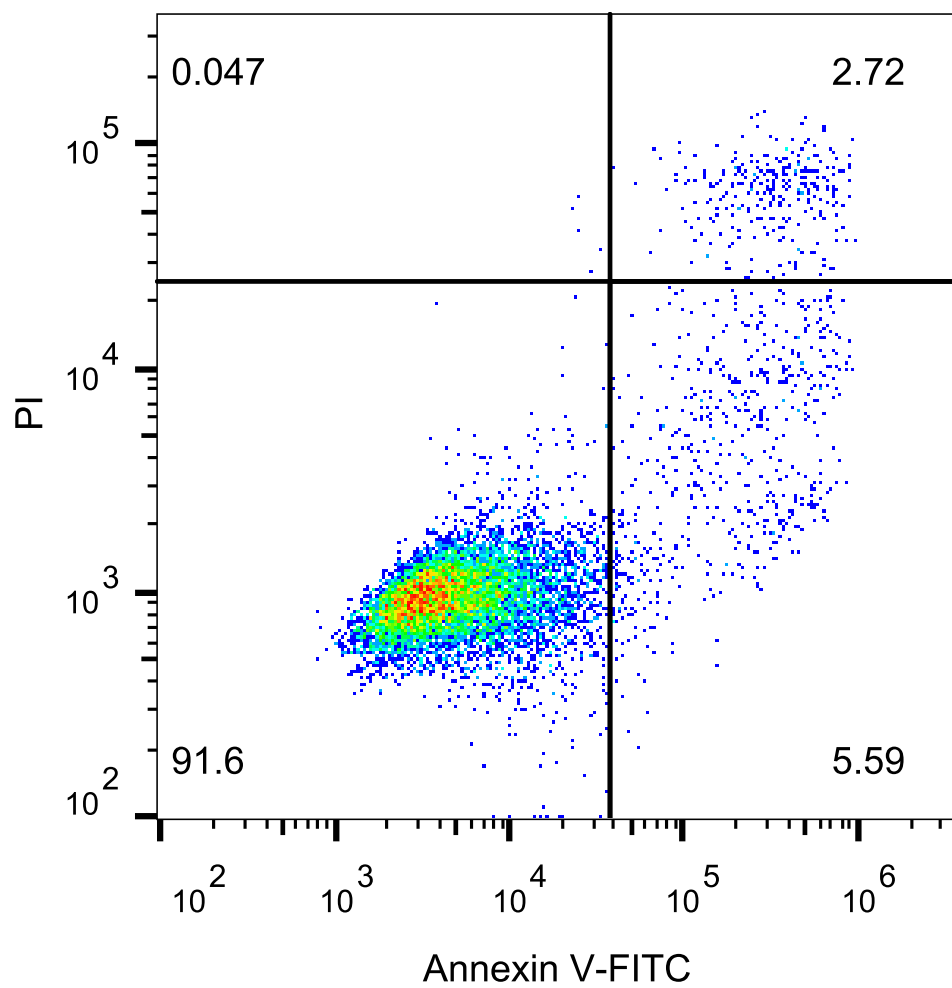

HD-3.fcs

FSC-A, FSC-Width subset

10547

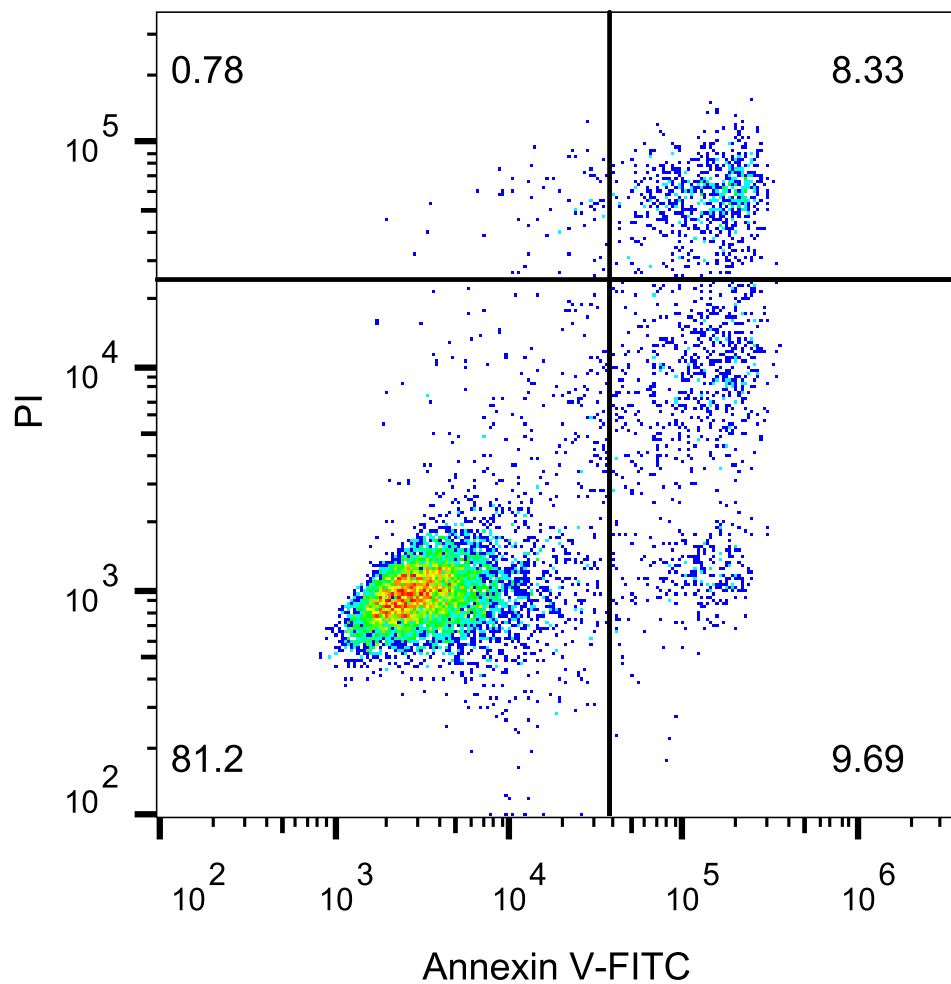

H-siclpp-1.fcs

FSC-A, FSC-Width subset

9475

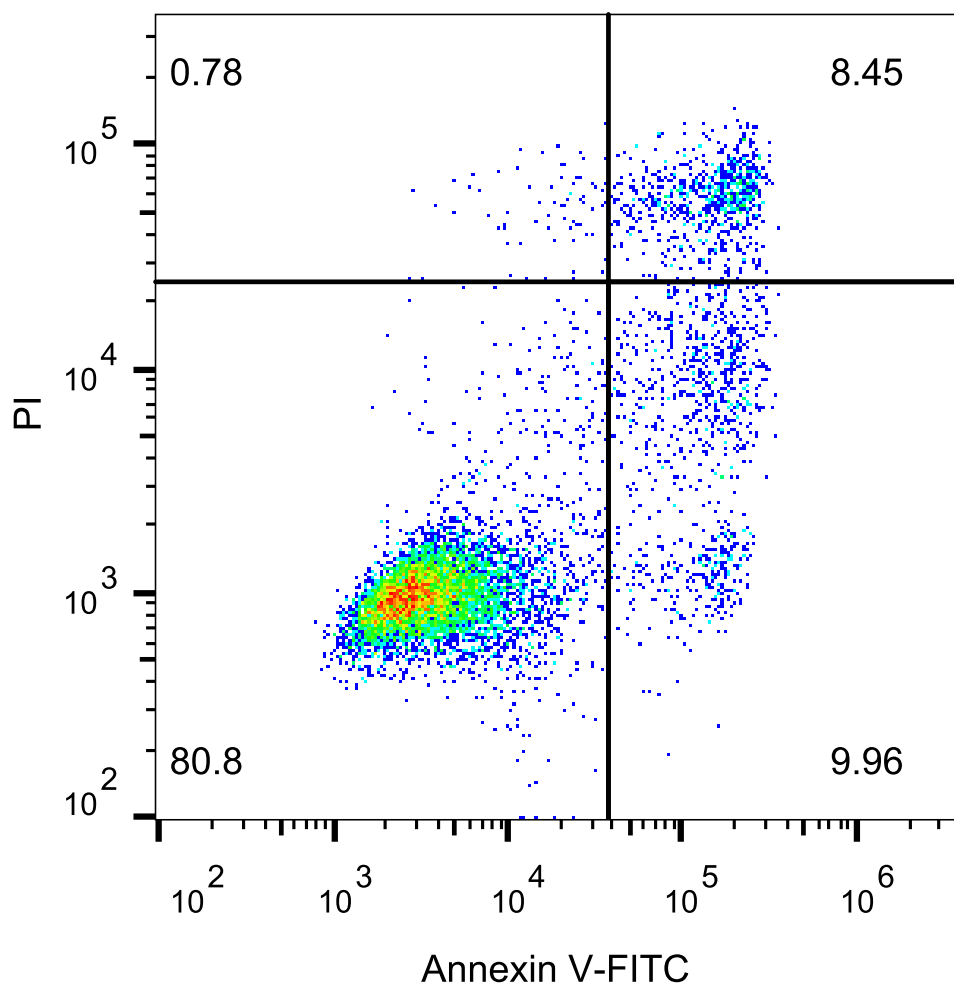

H-siclpp-2.fcs

FSC-A, FSC-Width subset

9247



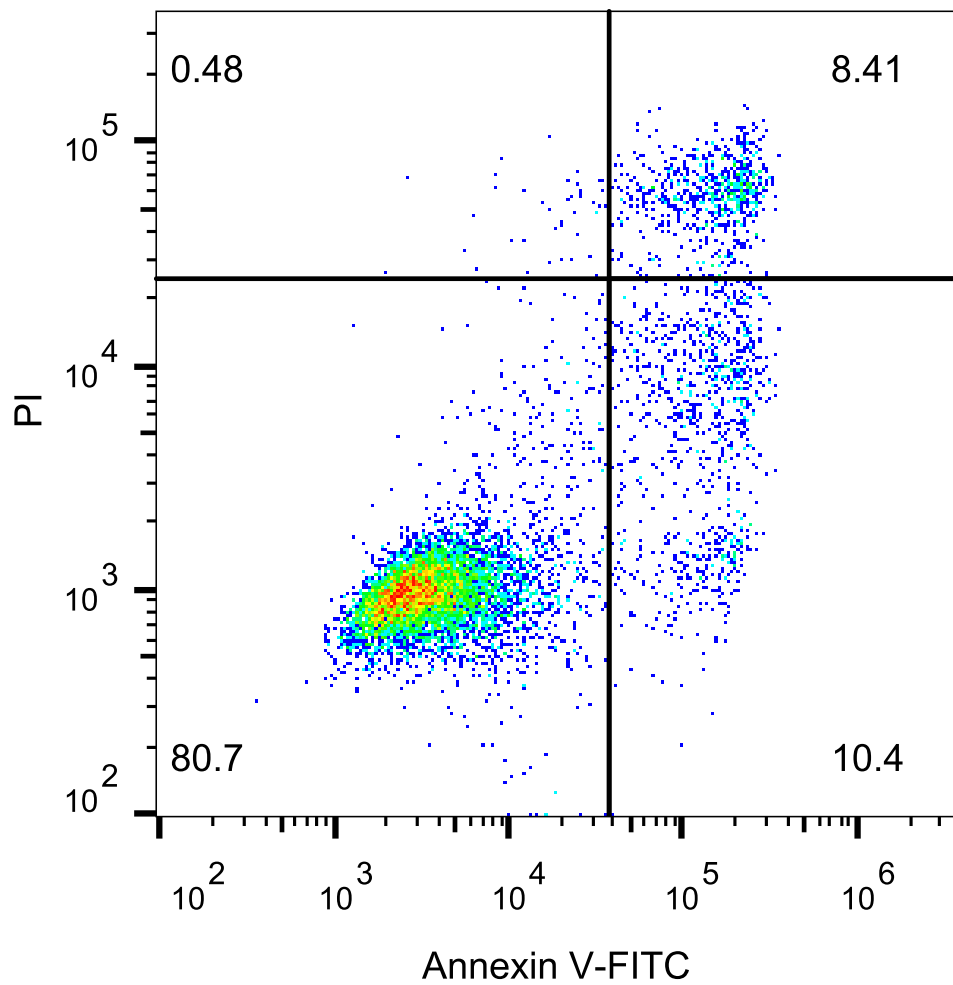

H-siclpp-3.fcs

FSC-A, FSC-Width subset

9151

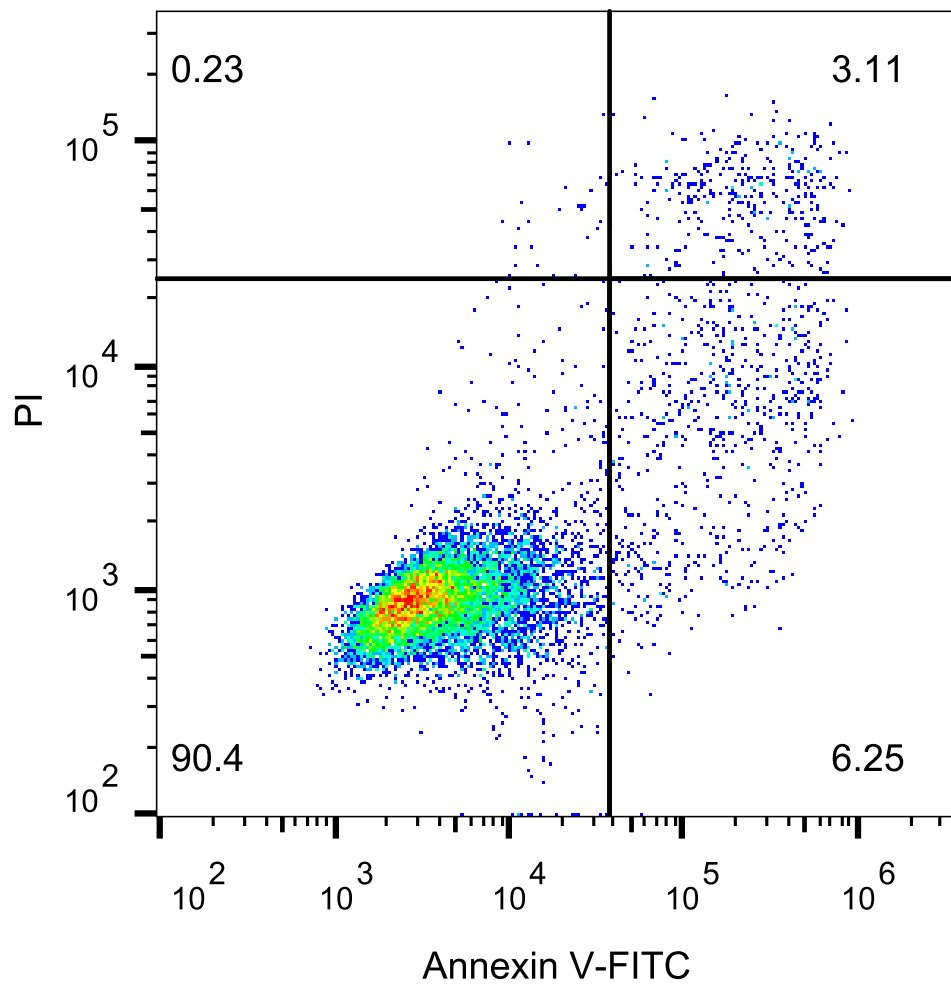

HF-1.fcs  
FSC-A, FSC-Width subset  
11127

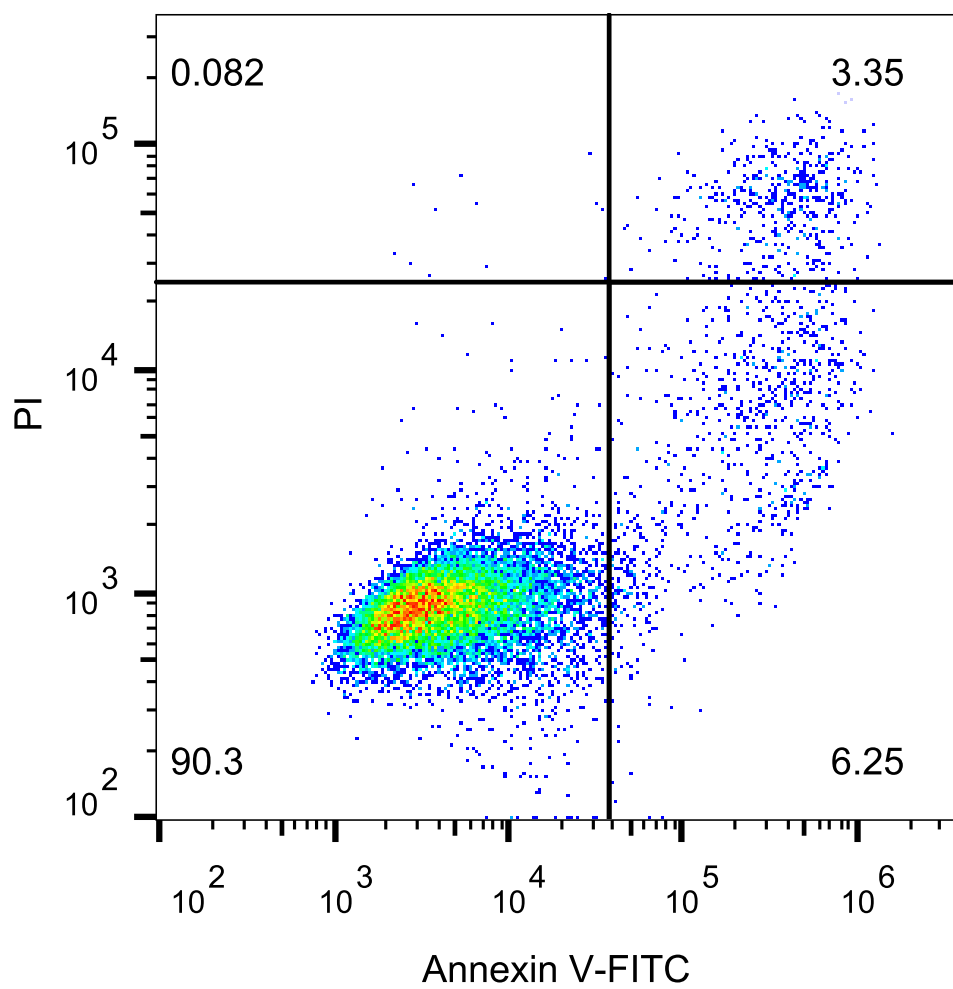

HF-2.fcs  
FSC-A, FSC-Width subset  
14648

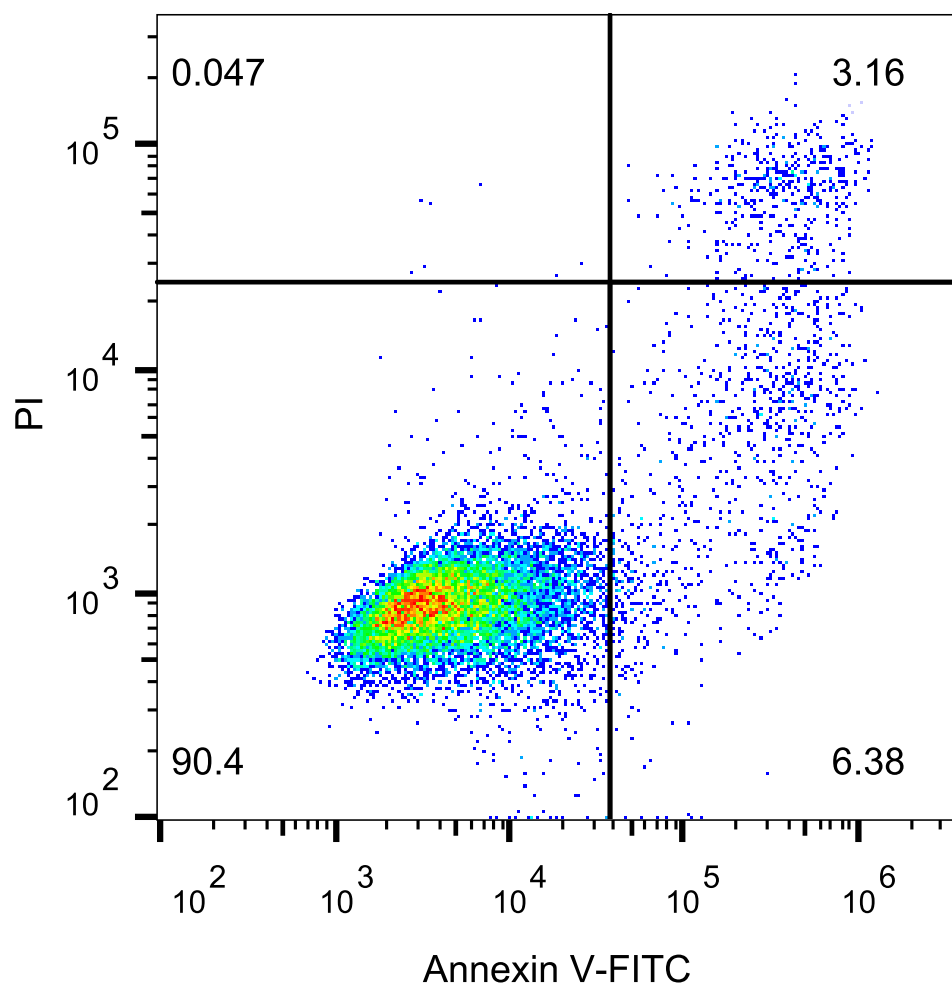

HF-3.fcs

FSC-A, FSC-Width subset

14901

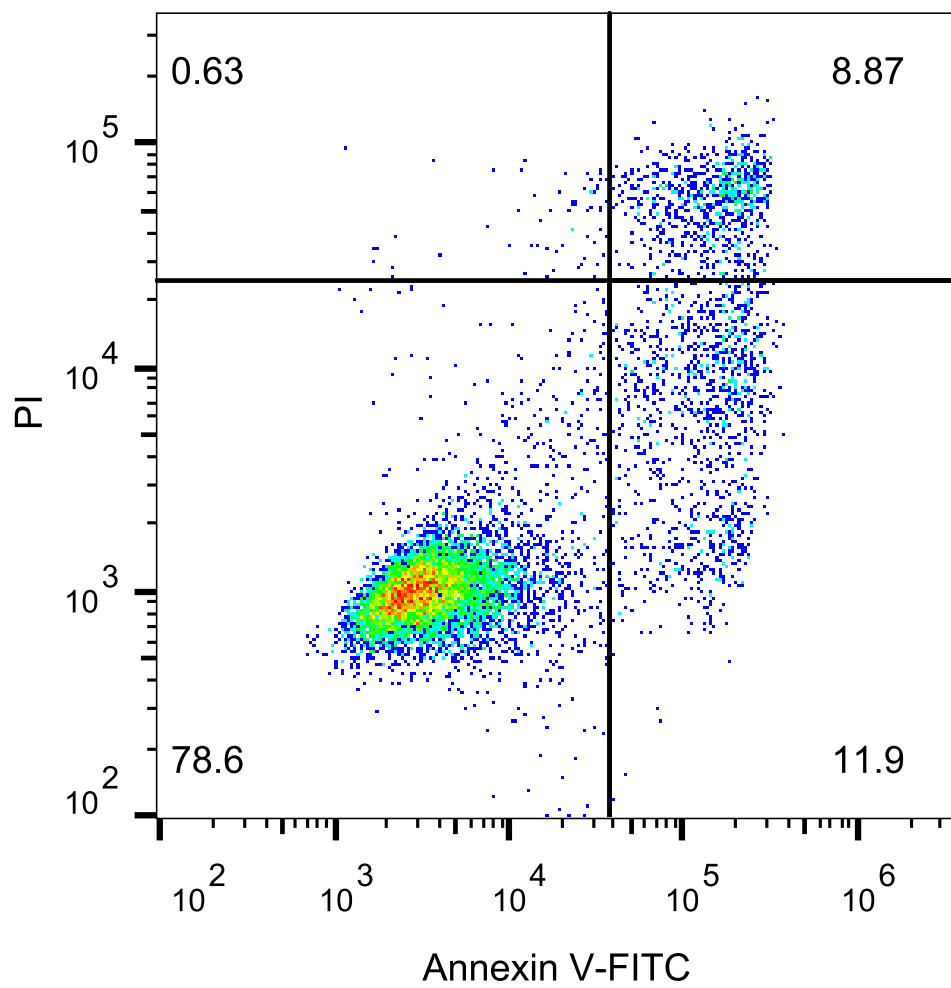

HF-20-1.fcs

FSC-A, FSC-Width subset

10329

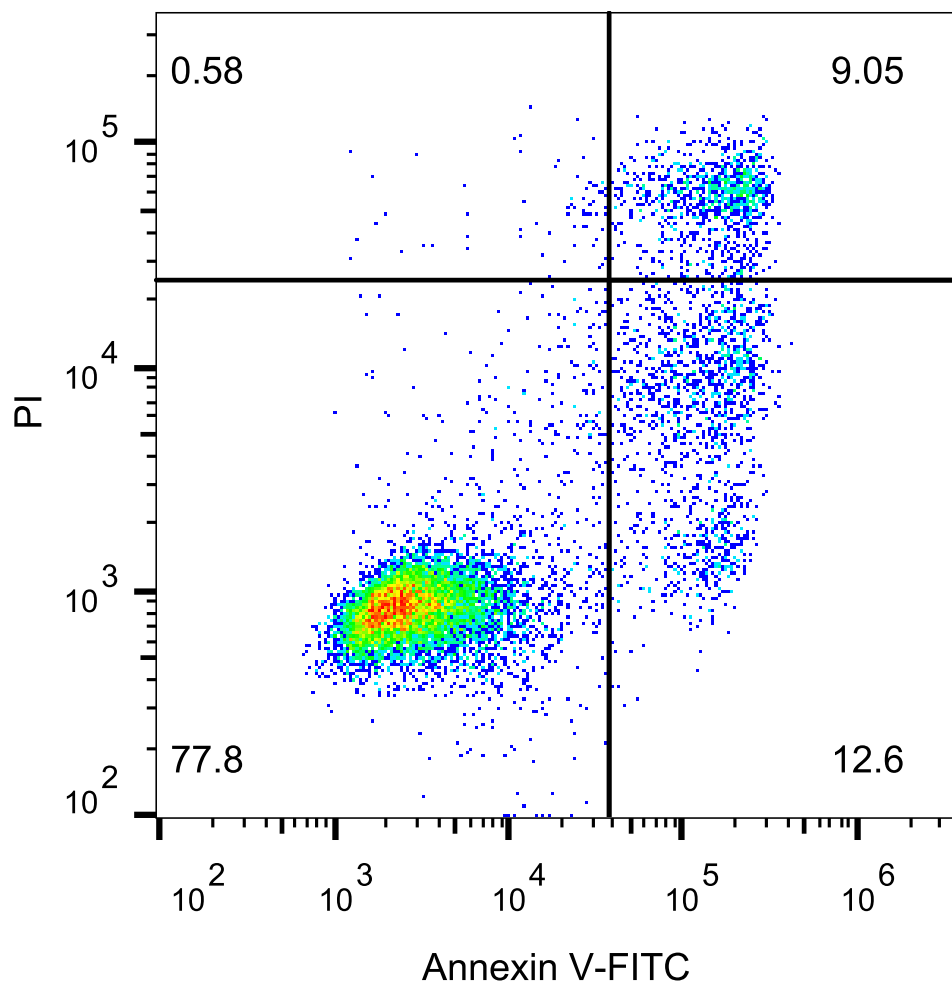

HF-20-2.fcs

FSC-A, FSC-Width subset

12126

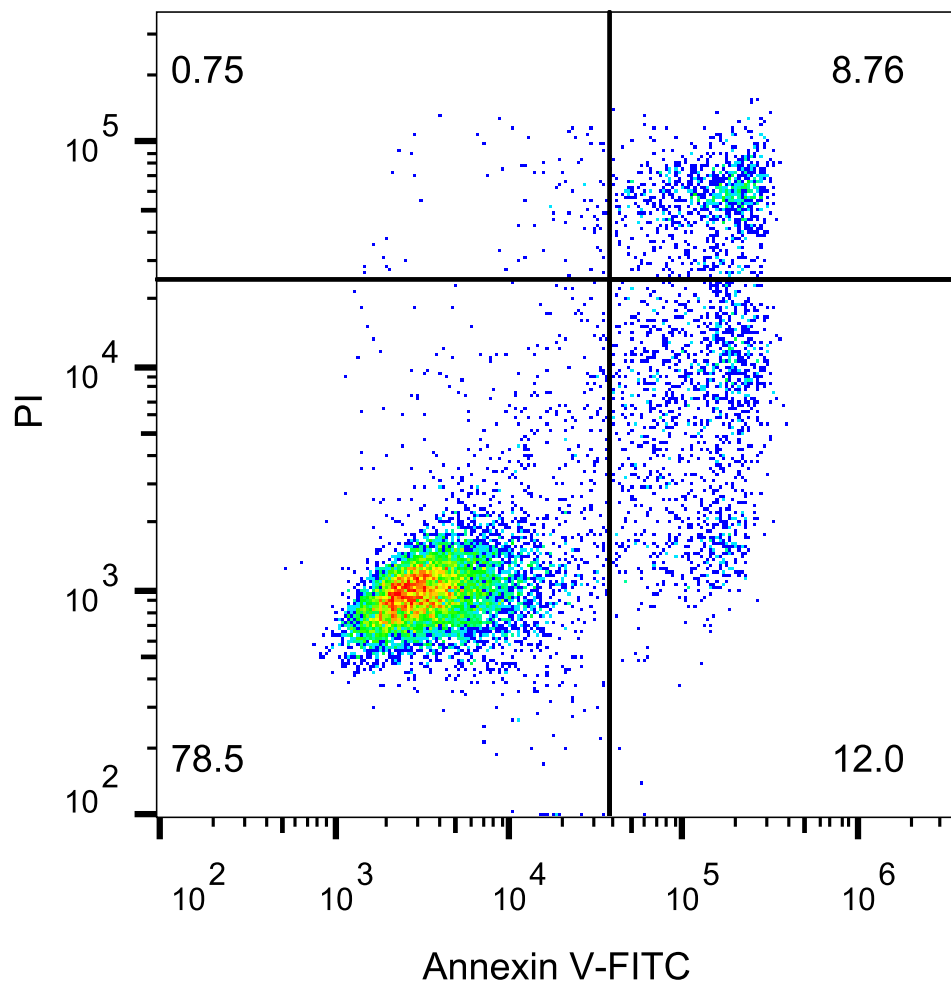

HF-20-3.fcs  
FSC-A, FSC-Width subset  
11728

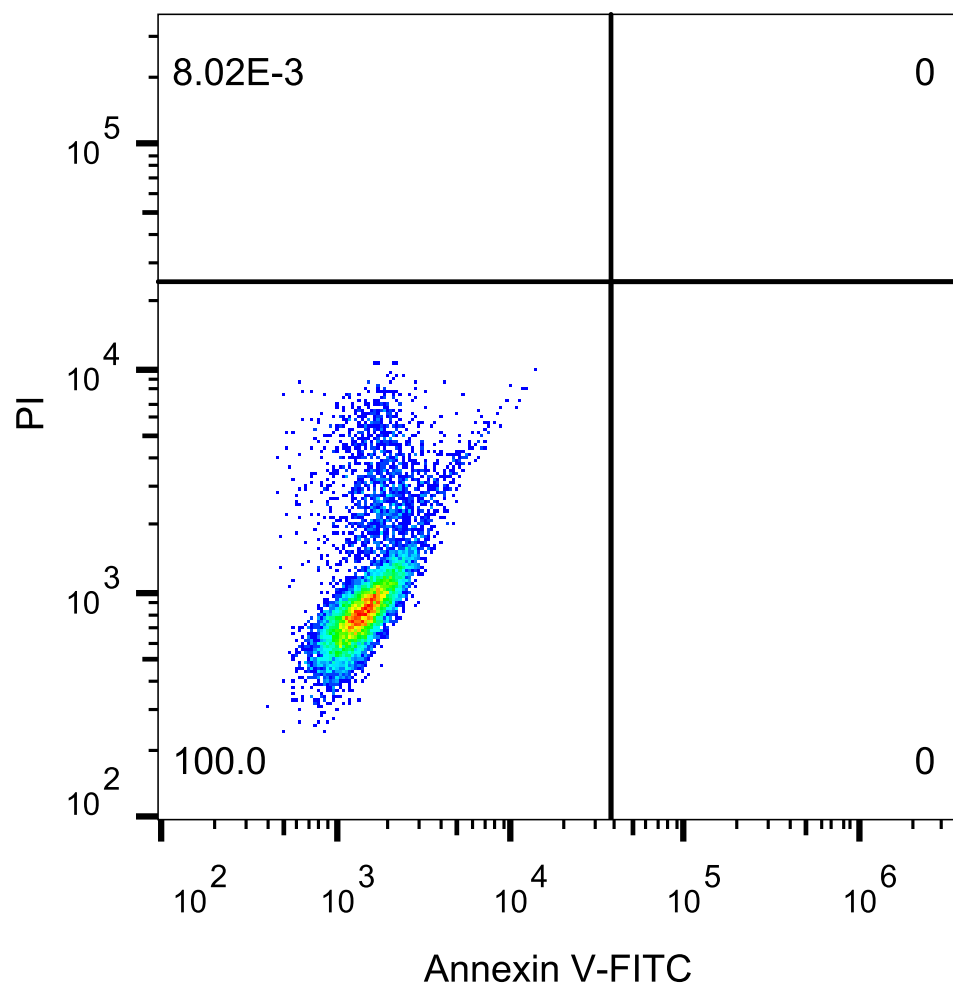

men.fcs

FSC-A, FSC-Width subset

12476
